# Supplementary material for: Identification of Novel Androgen-Regulated Pathways and mRNA Isoforms through Genome-Wide Exon-Specific Profiling of the LNCaP Transcriptome
Source: PLoS One. 2011 Dec 14;6(12):e29088. doi: 10.1371/journal.pone.0029088 (PMC3237596; doi:10.1371/journal.pone.0029088)
Supplement: Table S1 — Androgen-regulated gene expression changes. Individual gene expression changes following androgen treatment are shown with fold change predicted based upon microarray prediction, and the actual fold change where measured by RT-PCR. Androgen-regulated genes identified previously published studies are indicated. The functions and associated processes of each gene are annotated where known. (XLS) [file pone.0029088.s006.xls]

## Sheet: GO genes
All Genes				Novel Genes:
gene_assi	GeneSymbol			gene_assi	GeneSymbol
NM_004996	ABCC1			NM_152924	ABHD2
NM_005845	ABCC4			NM_152924	ABHD3
NM_152924	ABHD2			NM_138340	ACAD8 Isobutyryl-CoA dehydrogenase (EC 1.3.99), encoded by the ACAD8 gene, catalyzes the third step of the degradation of the branched chain amino acid valine (Nguyen et al., 2002 [PubMed 12359132]).[supplied by OMIM
NM_152924	ABHD2			NM_002313	ADAM22
NM_138340	ABHD3			NM_014384	ADCY1
NM_002313	ABLIM1			NM_004457	ADPGK
NM_014384	ACAD8 Isobutyryl-CoA dehydrogenase (EC 1.3.99), encoded by the ACAD8 gene, catalyzes the third step of the degradation of the branched chain amino acid valine (Nguyen et al., 2002 [PubMed 12359132]).[supplied by OMIM			NM_021723	AFF3
NM_004457	ACSL3			NM_006988	AGR2 anterior gradient homolog 2 (Xenopus laevis)
NM_021723	ADAM22			NM_021116	AHNAK2
NM_006988	ADAMTS1			NM_016824	ALS2CR13
NM_021116	ADCY1			NM_031284	ANGPT2
NM_016824	ADD3			NM_001025	ANKRD16
NM_031284	ADPGK			NM_006408	ANKRD37
NM_001025	AFF3			BC090889	ANKS1B
NM_006408	AGR2 anterior gradient homolog 2 (Xenopus laevis)			NM_000693	ANTXR1
BC090889	AHNAK2			NM_173511	ANXA9
NM_000693	ALDH1A3			NM_001147	APBA2
NM_173511	ALS2CR13			NM_054027	ARFGAP3
NM_001147	ANGPT2			NM_019046	ARFIP2
NM_054027	ANKH			NM_181726	ARHGAP18
NM_019046	ANKRD16			NM_152788	ARHGAP29
NM_181726	ANKRD37			NM_032208	ATP11C
NM_152788	ANKS1B			NM_003568	ATP1B1
NM_032208	ANTXR1			NM_005503	BCAP29
NM_003568	ANXA9			NM_006380	BHLHB8 basic helix-loop-helix domain containing, class B, 8
NM_005503	APBA2			NM_001660	BIRC3
NM_006380	APPBP2			NM_014570	BMPR1B
NM_001660	ARF4			NM_012402	BVES
NM_014570	ARFGAP3			NM_033515	C14orf143
NM_012402	ARFIP2			NM_004815	C14orf4
NM_033515	ARHGAP18			NM_006010	C16orf61
NM_004815	ARHGAP29			NM_014109	C17orf28
NM_006010	ARMET			NM_173694	C19orf10
NM_014109	ATAD2 atad2 and Name: ATPase family, AAA domain containing 2			NM_001677	C1orf116
NM_173694	ATP11C			NM_001185	C1orf26
NM_001677	ATP1B1			NM_004048	C1R
NM_001185	AZGP1			NM_012342	C2orf37
NM_004048	B2M			NM_000465	C3orf58
NM_012342	BAMBI			NM_001008	C5orf30
NM_000465	BARD1			NM_177455	C6orf192
NM_001008	BCAP29			NM_001165	C6orf66
NM_177455	BHLHB8 basic helix-loop-helix domain containing, class B, 8			NM_001203	C6orf85
NM_001165	BIRC3			NM_015415	C7orf41
NM_001203	BMPR1B			NM_000060	C8orf32
NM_015415	BRP44			NM_006763	C8orf57
NM_000060	BTD			NM_147147	C9orf91
NM_006763	BTG2			NM_145231	CACNB2
NM_147147	BVES			NM_024496	CADPS2
NM_145231	C14orf143			AK123193	CAMK2B
NM_024496	C14orf4			AK125514	CAMK2D
AK123193	C16orf61			NM_019107	CANT1
AK125514	C17orf28			NM_023938	CBFA2T2
NM_019107	C19orf10			NM_030806	CBLL1
NM_023938	C1orf116			AK000128	CBLN2
NM_030806	C1orf21			NM_001733	CCDC141 coiled-coil domain containing 141
AK000128	C1orf26			NM_015701	CCDC4
NM_001733	C1R			NM_025000	CDCA7L
NM_015701	C2orf30			AK095400	CDH26
NM_025000	C2orf37			NM_004772	CDK6
AK095400	C3orf58			AK090558	CDON
NM_004772	C5orf13			NM_052831	CDYL2
AK090558	C5orf30			NM_014165	CGNL1
NM_052831	C6orf192			NM_021945	ChGn
NM_014165	C6orf66			NM_152793	CHML
NM_021945	C6orf85			AK225643	CHST10
NM_152793	C7orf41			AL136588	CLDN8 Claudins, such as CLDN8, are components of epithelial cell tight junctions.
AK225643	C8orf32			NM_153045	CNKSR2
AL136588	C8orf57			NM_001218	CNKSR3
NM_153045	C9orf91			NM_138375	COLEC12
NM_001218	CA12			NM_201571	CPEB3
NM_138375	CABLES1			NM_017954	CPN1
NM_201571	CACNB2			NM_033138	CRELD2
NM_017954	CADPS2			NM_001219	CRISPLD2
NM_033138	CALD1			NM_001220	CXCR4
NM_001219	CALU			NM_172127	CXorf57
NM_001220	CAMK2B			NM_018584	CYP2U1 Official Symbol CYP2U1 and Name: cytochrome P450, family 2, subfamily U, polypeptide 1 [Homo sapiens]
NM_172127	CAMK2D			NM_006549	DDIT4
NM_018584	CAMK2N1			NM_138793	DDX58
NM_006549	CAMKK2			NM_004930	DEPDC6
NM_138793	CANT1			NM_005093	DERL2
NM_004930	CAPZB			NM_024814	DGAT2
NM_005093	CBFA2T2			NM_182511	DGKA
NM_024814	CBLL1			BX649042	DGKH
NM_182511	CBLN2			NM_207406	DIAPH2
BX649042	CCDC141 coiled-coil domain containing 141			NM_004354	DIS3L
NM_207406	CCDC4			NM_018719	DMXL2
NM_004354	CCNG2			NM_177980	DNASE2B
NM_018719	CDCA7L			NM_001259	DSEL
NM_177980	CDH26			NM_016952	DTL
NM_001259	CDK6			NM_152342	EBP
NM_016952	CDON			NM_018455	ECOP
NM_152342	CDYL2			NM_032866	EDEM1
NM_018455	CENPN			NM_018371	EDEM3
NM_032866	CGNL1			NM_001277	EDG7 lysophosphatidic acid receptor 3
NM_018371	ChGn			NM_001821	EML1
NM_001277	CHKA			NM_000742	EML5
NM_001821	CHML			NM_004854	ENC1
NM_000742	CHRNA2			NM_199328	ERN1
NM_004854	CHST10			NM_014927	ERRFI1
NM_199328	CLDN8 Claudins, such as CLDN8, are components of epithelial cell tight junctions.			NM_173515	EXO1
NM_014927	CNKSR2			NM_130386	EXPH5
NM_173515	CNKSR3			NM_016128	F2R
NM_130386	COLEC12			NM_014912	F5 coagulation factor V (proaccelerin, labile factor) [Homo sapiens
NM_016128	COPG			NM_001308	FAM105A
NM_014912	CPEB3			NM_130898	FAM111B
NM_001308	CPN1			NM_024324	FAM129A
NM_130898	CREB3L4			NM_031476	FAM134B
NM_024324	CRELD2			NM_001012	FBXW2
NM_031476	CRISPLD2			NM_001008	FCHSD2
NM_001012	CTBP1			AK001040	FIGNL1
NM_001008	CXCR4			NM_153611	FLJ45803
AK001040	CXorf57			NM_001037	FRAP1
NM_153611	CYBASC3			NM_183075	FRK
NM_001037	CYFIP2			NM_014392	FUT8
NM_183075	CYP2U1 Official Symbol CYP2U1 and Name: cytochrome P450, family 2, subfamily U, polypeptide 1 [Homo sapiens]			NM_020548	FZD5 FZD5 and Name: frizzled homolog 5 (Drosophila) [Homo sapiens]
NM_014392	D4S234E			NM_000790	GADD45G
NM_020548	DBI			NM_003887	GALK2
NM_000790	DDC			NM_019058	GALNT10
NM_003887	DDEF2			NM_014314	GARNL3
NM_019058	DDIT4			NM_022783	GIMAP2
NM_014314	DDX58			NM_016041	GINS1
NM_022783	DEPDC6			NM_032564	GLCE
NM_016041	DERL2			NM_201444	GLUD2
NM_032564	DGAT2			NM_178009	GLYATL2
NM_201444	DGKA			NM_014762	GMPPA
NM_178009	DGKH			NM_006729	GMPPB
NM_014762	DHCR24			NM_133375	GOLGA4
NM_006729	DIAPH2			NM_015263	GPR126
NM_133375	DIS3L			NM_012328	GPR137B
NM_015263	DMXL2			NM_018981	GPR160
NM_012328	DNAJB9			NM_021233	GPR177
NM_018981	DNAJC10			NM_001386	GPR63
NM_021233	DNASE2B			NM_032160	GPR98
NM_001386	DPYSL2			NM_016448	GRAMD1C
NM_032160	DSEL			NM_018456	GRB10
NM_016448	DTL			---	GREB1
NM_018456	EAF2			NM_030796	GRHL1
---	EBP			NM_014674	GRIK1
NM_030796	ECOP			NM_025191	GSTK1
NM_014674	EDEM1			NM_012152	HACL1
NM_025191	EDEM3			NM_012081	HECTD2
NM_012152	EDG7 lysophosphatidic acid receptor 3			NM_001008	HERPUD1
NM_012081	ELL2			NM_183387	HIST1H3B
NM_001008	EML1			NM_003633	HM13
NM_183387	EML5			NM_021572	HSPA4L
NM_003633	ENC1			NM_005233	HYPE
NM_021572	ENPP5			NM_016570	IL1RAP
NM_005233	EPHA3			NM_001433	IL1RN
NM_016570	ERGIC2			NM_018948	INSIG1 insulin induced gene 1
NM_001433	ERN1			NM_130398	IQUBIQ motif and ubiquitin domain containing
NM_018948	ERRFI1			NM_015065	ITGA2
NM_130398	EXO1			NM_001992	KCNAB2
NM_015065	EXPH5			NM_000130	KCNMA1
NM_001992	F2R			NM_013402	KCNN2
NM_000130	F5 coagulation factor V (proaccelerin, labile factor) [Homo sapiens			AL512750	KCNS3
NM_013402	FADS1			BC062456	KHDRBS3
AL512750	FAM105A			NM_052966	KIAA0247
BC062456	FAM111B			NM_001034	KITLG
NM_052966	FAM129A			NM_004104	KLHL23
NM_001034	FAM134B			NM_012164	KLHL23
NM_004104	FASN			NM_014824	LDLR
NM_012164	FBXW2			NM_004462	LNX2
NM_014824	FCHSD2			NM_022116	LOC400451
NM_004462	FDFT1			NM_004117	LOC728937
NM_022116	FIGNL1			NM_207429	LOC728937
NM_004117	FKBP5			NM_212482	LOC81691
NM_207429	FLJ45803			NM_004958	LOC89944
NM_212482	FN1			NM_002031	LPIN1
NM_004958	FRAP1			NM_178154	LRCH1
NM_002031	FRK			NM_017412	LRIG3
NM_178154	FUT8			NM_003468	LRRC16
NM_017412	FZD3			NM_006705	LRRC59
NM_003468	FZD5 FZD5 and Name: frizzled homolog 5 (Drosophila) [Homo sapiens]			NM_001001	LRRC8A
NM_006705	GADD45G			NM_198321	LRRN1
NM_001001	GALK2			NM_032293	LUZP2
NM_198321	GALNT10			NM_032638	LYN
NM_032293	GARNL3			NM_000163	MAK
NM_032638	GATA2			NM_015660	MALT1
NM_000163	GHR			BC012542	MAN1A1
NM_015660	GIMAP2			NM_015554	MANBA
BC012542	GINS1			NM_012084	MANEA
NM_015554	GLCE			NM_145016	MAP2K4
NM_012084	GLUD2			NM_205847	MAP2K6
NM_145016	GLYATL2			NM_013334	MAP7D1
NM_205847	GMPPA			NM_018960	MARCH1
NM_013334	GMPPB			NM_002078	MGAT4A
NM_018960	GNMT			NM_020918	MID1
NM_002078	GOLGA4			NM_020455	MLPH
NM_020918	GPAM			NM_003272	MMAA
NM_020455	GPR126			NM_014373	MRPS18A
NM_003272	GPR137B			NM_024911	MUM1L1
NM_014373	GPR160			NM_030784	NANS
NM_024911	GPR177			NM_032119	NAPE-PLD
NM_030784	GPR63			NM_017577	NAT1 N-acetyltransferase 1 (arylamine N-acetyltransferase)
NM_032119	GPR98			NM_001001	NAV1
NM_017577	GRAMD1C			NM_014668	NCAPD3
NM_001001	GRB10			NM_014552	NCOA7
NM_014668	GREB1			NM_175611	NDFIP2 Nedd4 family interacting protein 2
NM_014552	GRHL1			NM_015917	NEK1
NM_175611	GRIK1			NM_002095	NEK6
NM_015917	GSTK1			NM_012260	NFRKB
NM_002095	GTF2E2			NM_182765	NLGN1
NM_012260	HACL1			NM_014606	NR1D2
NM_182765	HECTD2			NM_001010	NR3C2
NM_014606	HERC3			NM_003537	NUAK2
NM_001010	HERPUD1			NM_003071	NUPL1
NM_003537	HIST1H3B			NM_178580	OBFC2A
NM_003071	HLTF			NM_000859	ORM2
NM_178580	HM13			NM_001098	OSR2
NM_000859	HMGCR			NM_199330	OTUD7B
NM_001098	HMGCS1			NM_000860	PACS1
NM_199330	HOMER2			NM_005114	PAK1
NM_000860	HPGD			NM_014278	PAK1IP1
NM_005114	HS3ST1			NM_007076	PART1
NM_014278	HSPA4L			NM_004508	PCBD2
NM_007076	HYPE			NM_000875	PECI
NM_004508	IDI1			NM_002182	PELI2
NM_000875	IGF1R			NM_173842	PER3
NM_002182	IL1RAP			NM_000884	PEX10
NM_173842	IL1RN			NM_003866	PFKFB2
NM_000884	IMPDH2			NM_198336	PHF8
NM_003866	INPP4B			NM_018142	PHGDH
NM_198336	INSIG1 insulin induced gene 1			NM_006633	PHLDB2
NM_018142	INTS10			NM_178827	PIK3C2B
NM_006633	IQGAP2			NM_002203	PIK3IP1
NM_178827	IQUBIQ motif and ubiquitin domain containing			NM_002210	PIK3R1
NM_002203	ITGA2			NM_003636	PKIB
NM_002210	ITGAV			NM_002247	PKP4
NM_003636	KCNAB2			NM_021614	PLDN
NM_002247	KCNMA1			NM_002252	PLK2
NM_021614	KCNN2			NM_016121	PMS2
NM_002252	KCNS3			NM_006854	POLR3E
NM_016121	KCTD3			NM_006558	PPAP2A
NM_006854	KDELR2			---	PPAPDC2
NM_006558	KHDRBS3			NM_000899	PPFIBP1
---	KIAA0247			NM_005655	PPFIBP2
NM_000899	KITLG			NM_004235	PPM1K
NM_005655	KLF10			NM_144711	PRAC
NM_004235	KLF4			NM_144711	PRIM1
NM_144711	KLHL23			NM_001002	PRKAA2
NM_144711	KLHL23			NM_001030	PRKCA
NM_001002	KLK2			NM_004917	PRKCH
NM_001030	KLK3			NM_002273	PSAT1
NM_004917	KLK4			NM_002293	PSCD1
NM_002273	KRT8			NM_002298	PSCD3
NM_002293	LAMC1			NM_000527	PTGER4
NM_002298	LCP1			NM_006499	PTPN14
NM_000527	LDLR			NM_002309	RAB3B
NM_006499	LGALS8			NM_002310	RAG1AP1
NM_002309	LIF			NM_153371	RAI14
NM_002310	LIFR			NM_207446	RAPGEF5
NM_153371	LNX2			NM_024770	RASAL2
NM_207446	LOC400451			NM_024770	RASSF5
NM_024770	LOC728937			NM_030941	RAVER2 Raver2 and Name: ribonucleoprotein, PTB-binding 2 [Mus musculus]
NM_024770	LOC728937			AY358497	RBBP9
NM_030941	LOC81691			NM_152271	RCAN3
AY358497	LOC89944			NM_145693	RDH10
NM_152271	LONRF1			NM_006726	RELN
NM_145693	LPIN1			NM_015116	RFX3
NM_006726	LRBA			NM_015541	RGL1
NM_015116	LRCH1			NM_153377	RHOU
NM_015541	LRIG1			NM_017640	RNF43
NM_153377	LRIG3			NM_017691	ROBO1
NM_017640	LRRC16			NM_018509	RPL5
NM_017691	LRRC49			NM_019594	SAMHD1
NM_018509	LRRC59			NM_006309	SASH1
NM_019594	LRRC8A			NM_020873	SDC2
NM_006309	LRRFIP2			NM_001009	SDF2L1
NM_020873	LRRN1			NM_002350	SEC14L2
NM_001009	LUZP2			NM_001031	SEC24A
NM_002350	LYN			NM_005906	SEMA6D
NM_001031	MAF			NM_173844	SEPT11
NM_005906	MAK			NM_005907	SEPT6
NM_173844	MALT1			NM_005908	SESN3
NM_005907	MAN1A1			NM_024641	SH3BGRL2
NM_005908	MANBA			NM_003010	SH3RF1
NM_024641	MANEA			NM_002758	SHROOM3
NM_003010	MAP2K4			NM_018067	SLC16A6
NM_002758	MAP2K6			NM_002748	SLC25A20
NM_018067	MAP7D1			NM_017923	SLC27A2
NM_002748	MAPK6			NM_017824	SLC2A3
NM_017923	MARCH1			NM_203377	SLC38A4
NM_017824	MARCH5			NM_138799	SLC39A7
NM_203377	MB			NM_022132	SLC41A1
NM_138799	MBOAT2			NM_006343	SLC43A1
NM_022132	MCCC2			NM_012214	SLC45A3
NM_006343	MERTK			NM_000381	SLC7A11
NM_012214	MGAT4A			NM_013255	SLC7A2
NM_000381	MID1			NM_024101	SLC9A7
NM_013255	MKLN1			NM_172250	SLCO5A1
NM_024101	MLPH			NM_005941	SLFN5
NM_172250	MMAA			NM_022782	SLITRK3
NM_005941	MMP16			NM_018135	SLITRK6
NM_022782	MPHOSPH9 MPHOSPH9 M-phase phosphoprotein 9			#VALUE!	SMAD1
NM_018135	MRPS18A			NM_152423	SMC6
#VALUE!	MTMR9			NM_002467	SMPD2
NM_152423	MUM1L1			NM_018946	SNAPC2
NM_002467	MYC			NM_004538	SNORA13
NM_018946	NANS			NM_198990	SOCS2
NM_004538	NAP1L3			NM_000662	SORBS2
NM_198990	NAPE-PLD			NM_020443	SP4
NM_000662	NAT1 N-acetyltransferase 1 (arylamine N-acetyltransferase)			NM_015261	SPOCK1
NM_020443	NAV1			NM_181782	SPTLC3
NM_015261	NCAPD3			NM_019080	SRGAP3
NM_181782	NCOA7			NM_006096	ST3GAL4
NM_019080	NDFIP2 Nedd4 family interacting protein 2			NM_012224	ST5
NM_006096	NDRG1			NM_014397	ST6GALNAC1
NM_012224	NEK1			NM_020529	STEAP4
NM_014397	NEK6			NM_006165	STK17B
NM_020529	NFKBIA			NM_004148	STK39
NM_006165	NFRKB			NM_014932	SYNE2
NM_004148	NINJ1			NM_005126	SYTL2
NM_014932	NLGN1			NM_000901	TBC1D4
NM_005126	NR1D2			NM_002135	TBC1D8
NM_000901	NR3C2			NM_030952	TDP1
NM_002135	NR4A1			NM_014089	TGM3
NM_030952	NUAK2			NM_001031	TIMP2
NM_014089	NUPL1			NM_002539	TIPARP TCDD-inducible poly(ADP-ribose) polymerase
NM_001031	OBFC2A			NM_000912	TLL1
NM_002539	ODC1 Official Symbol Odc1 and Name: ornithine decarboxylase, structural 1			NM_000607	TLN2
NM_000912	OPRK1			NM_000608	TLR3
NM_000607	ORM1			NM_053001	TMCC3
NM_000608	ORM2			NM_020205	TMED5
NM_053001	OSR2			NM_018026	TMEM117
NM_020205	OTUD7B			NM_002576	TMEM118
NM_018026	PACS1			NM_017906	TMEM140
NM_002576	PAK1			AK094518	TMEM144
NM_017906	PAK1IP1			NM_002585	TMEM39A
AK094518	PART1			---	TMEM45B
NM_002585	PBX1			NM_018931	TMEM79
---	PCBD2			NM_021213	TMEM87B
NM_018931	PCDHB11			NM_006810	TNFAIP3
NM_021213	PCTP			NM_003768	TNFSF15
NM_006810	PDIA5			NM_206836	TNIK
NM_003768	PEA15			NM_021255	TP53
NM_206836	PECI			NM_016831	TP53INP1
NM_021255	PELI2			NM_153818	TPCN1
NM_016831	PER3			NM_006212	TPM1
NM_153818	PEX10			NM_018290	TRIB1
NM_006212	PFKFB2			NM_173582	TRIM25
NM_018290	PGM2			NM_015599	TRIM36
NM_173582	PGM2L1 AGM?			NM_015107	TRIM52
NM_015599	PGM3			NM_006623	TRPM8
NM_015107	PHF8			NM_145753	TSKU
NM_006623	PHGDH			NM_007166	TSPAN7
NM_145753	PHLDB2			NM_002646	TSPYL2
NM_007166	PICALM			NM_052880	TULP4
NM_002646	PIK3C2B			NM_181523	UGT2B15
NM_052880	PIK3IP1			NM_003629	UGT2B17
NM_181523	PIK3R1			NM_181794	UGT2B28
NM_003629	PIK3R3			NM_003628	USP25
NM_181794	PKIB			NM_000300	USP33
NM_003628	PKP4			NM_002662	USP53
NM_000300	PLA2G2A			NM_012388	VEGFA
NM_002662	PLD1			NM_006622	VLDLR very low density lipoprotein receptor
NM_012388	PLDN			NR_003085	VTA1
NM_006622	PLK2			NM_022490	WDR91
NR_003085	PMS2			NM_018119	WIPI1
NM_022490	POLR1E			NM_003711	WWC1 WW and C2 domain containing 1
NM_018119	POLR3E			NM_203453	YIPF1
NM_003711	PPAP2A			NM_003622	ZBTB1
NM_203453	PPAPDC2			NM_003621	ZC3H6
NM_003622	PPFIBP1			NM_152542	ZCCHC6
NM_003621	PPFIBP2			NM_002709	ZNF350
NM_152542	PPM1K			NM_032391	ZNF652
NM_002709	PPP1CB			NM_000946	SLC38A4
NM_032391	PRAC			NM_006252	SLC16A6
NM_000946	PRIM1			NM_002737	ERRFI1
NM_006252	PRKAA2			NM_006255	NCAPD3
NM_002737	PRKCA			NM_002742	STEAP4
NM_006255	PRKCH			NM_058179
NM_002742	PRKD1			NM_004762
NM_058179	PSAT1			NM_004227
NM_004762	PSCD1			NM_000958
NM_004227	PSCD3			NM_005401
NM_000958	PTGER4			NM_002833
NM_005401	PTPN14			NM_002845
NM_002833	PTPN9			NM_002849
NM_002845	PTPRM			NM_005859
NM_002849	PTPRR			NM_004580
NM_005859	PURA			NM_002867
NM_004580	RAB27A			NM_018845
NM_002867	RAB3B			NM_015577
NM_018845	RAG1AP1			NM_016732
NM_015577	RAI14			NM_012294
NM_016732	RALY			NM_170692
NM_012294	RAPGEF5			NM_182663
NM_170692	RASAL2			NM_018211
NM_182663	RASSF5			NM_006606
NM_018211	RAVER2 Raver2 and Name: ribonucleoprotein, PTB-binding 2 [Mus musculus]			NM_013441
NM_006606	RBBP9			NM_172037
NM_013441	RCAN3			NM_173054
NM_172037	RDH10			NM_134428
NM_173054	RELN			NM_015149
NM_134428	RFX3			NM_021205
NM_015149	RGL1			NM_182757
NM_021205	RHOU			NM_017763
NM_182757	RNF144B			NM_133631
NM_017763	RNF43			U66589 //
NM_133631	ROBO1			NM_015474
U66589 //	RPL5			NM_015278
NM_015474	SAMHD1			NM_002970
NM_015278	SASH1			NM_006745
NM_002970	SAT1			NM_012235
NM_006745	SC4MOL			NM_002998
NM_012235	SCAP			NM_002999
NM_002998	SDC2			NM_022044
NM_002999	SDC4			NM_012429
NM_022044	SDF2L1			NM_021982
NM_012429	SEC14L2			NM_014822
NM_021982	SEC24A			NM_153618
NM_014822	SEC24D			NM_018243
NM_153618	SEMA6D			NM_145799
NM_018243	SEPT11			NM_014445
NM_145799	SEPT6			NM_002639
NM_014445	SERP1			NM_014454
NM_002639	SERPINB5			NM_144665
NM_014454	SESN1			NM_005627
NM_144665	SESN3			NM_031469
NM_005627	SGK			NM_020870
NM_031469	SH3BGRL2			NM_020859
NM_020870	SH3RF1			NM_001041
NM_020859	SHROOM3			NM_003930
NM_001041	SI			NM_001046
NM_003930	SKAP2			NM_021082
NM_001046	SLC12A2			NM_152527
NM_021082	SLC15A2			NM_004694
NM_152527	SLC16A14			NM_000387
NM_004694	SLC16A6			NM_003645
NM_000387	SLC25A20			NM_006931
NM_003645	SLC27A2			NM_133496
NM_006931	SLC2A3			NM_017515
NM_133496	SLC30A7			NM_018018
NM_017515	SLC35F2			NM_006979
NM_018018	SLC38A4			NM_173854
NM_006979	SLC39A7			NM_003627
NM_173854	SLC41A1			NM_080546
NM_003627	SLC43A1			NM_033102
NM_080546	SLC44A1			NM_014331
NM_033102	SLC45A3			NM_003046
NM_014331	SLC7A11			NM_032591
NM_003046	SLC7A2			NM_030958
NM_032591	SLC9A7			NM_144975
NM_030958	SLCO5A1			NM_014926
NM_144975	SLFN5			NM_032229
NM_014926	SLITRK3			NM_001003
NM_032229	SLITRK6			NM_003078
NM_001003	SMAD1			NM_024624
NM_003078	SMARCD3			NM_003080
NM_024624	SMC6			NM_003068
NM_003080	SMPD2			NM_003083
NM_003068	SNAI2			NR_002922
NM_003083	SNAPC2			NM_031953
NR_002922	SNORA13			NM_003877
NM_031953	SNX25			NM_021069
NM_003877	SOCS2			NM_003104
NM_021069	SORBS2			NM_003105
NM_003104	SORD			NM_003112
NM_003105	SORL1			NM_021928
NM_003112	SP4			NM_012391
NM_021928	SPCS3			NM_006542
NM_012391	SPDEF			NM_004598
NM_006542	SPHAR			NM_005841
NM_004598	SPOCK1			NM_018327
NM_005841	SPRY1			NM_003129
NM_018327	SPTLC3			NM_014850
NM_003129	SQLE			NM_021203
NM_014850	SRGAP3			NM_012446
NM_021203	SRPRB			NM_007107
NM_012446	SSBP2			NM_006278
NM_007107	SSR3			NM_005418
NM_006278	ST3GAL4			NM_018414
NM_005418	ST5			NM_018412
NM_018414	ST6GALNAC1			NM_024636
NM_018412	ST7			NM_004226
NM_024636	STEAP4			NM_013233
NM_004226	STK17B			NM_182914
NM_013233	STK39			NM_206927
NM_182914	SYNE2			NM_005646
NM_206927	SYTL2			NM_015173
NM_005646	TARBP1			NM_014832
NM_015173	TBC1D1			NM_007063
NM_014832	TBC1D4			NM_032811
NM_007063	TBC1D8			NM_018319
NM_032811	TBRG1			NM_003245
NM_018319	TDP1			NM_003255
NM_003245	TGM3			NM_015508
NM_003255	TIMP2			NM_012464
NM_015508	TIPARP TCDD-inducible poly(ADP-ribose) polymerase			NM_015059
NM_012464	TLL1			NM_003265
NM_015059	TLN2			NM_020698
NM_003265	TLR3			NM_016040
NM_020698	TMCC3			AK097511
NM_016040	TMED5			---
AK097511	TMEM117			NM_018295
---	TMEM118			BC054487
NM_018295	TMEM140			NM_018266
BC054487	TMEM144			NM_138788
NM_018266	TMEM39A			AK056816
NM_138788	TMEM45B			AK074243
AK056816	TMEM79			NM_020182
AK074243	TMEM87B			NM_005656
NM_020182	TMEPAI			NM_006290
NM_005656	TMPRSS2			NM_003842
NM_006290	TNFAIP3			NM_005118
NM_003842	TNFRSF10B			NM_015028
NM_005118	TNFSF15			NM_000546
NM_015028	TNIK			NM_033285
NM_000546	TP53			NM_017901
NM_033285	TP53INP1			NM_001025
NM_017901	TPCN1			NM_000366
NM_001025	TPD52			NM_025195
NM_000366	TPM1			NM_005082
NM_025195	TRIB1			NM_018700
NM_005082	TRIM25			NM_032765
NM_018700	TRIM36			NM_024080
NM_032765	TRIM52			NM_014112
NM_024080	TRPM8			NM_183422
NM_014112	TRPS1			NM_015516
NM_183422	TSC22D1			NM_004615
NM_015516	TSKU			NM_022117
NM_004615	TSPAN7			NM_020245
NM_022117	TSPYL2			NM_003115
NM_020245	TULP4			NM_003342
NM_003115	UAP1			NM_016021
NM_003342	UBE2G1			U06641 //
NM_016021	UBE2J1			NM_001077
U06641 //	UGT2B15			NM_053039
NM_001077	UGT2B17			NM_013396
NM_053039	UGT2B28			NM_015017
NM_013396	USP25			NM_019050
NM_015017	USP33			NM_014000
NM_019050	USP53			NM_001025366
NM_014000	VCL			NM_003383
NM_001025366	VEGFA			NM_016485
NM_003383	VLDLR very low density lipoprotein receptor			NM_014149
NM_016485	VTA1			NM_017983
NM_014149	WDR91			NM_015238
NM_017983	WIPI1			NM_018982
NM_015238	WWC1 WW and C2 domain containing 1			NM_014950
NM_018982	YIPF1			NM_006006
NM_014950	ZBTB1			NM_014007
NM_006006	ZBTB16			NM_198581
NM_014007	ZBTB43			NM_024617
NM_198581	ZC3H6			NM_024721
NM_024617	ZCCHC6			NM_007129
NM_024721	ZFHX4			NM_021632
NM_007129	ZIC2			NM_014897
NM_021632	ZNF350
NM_014897	ZNF652
NM_004117	FKBP5
NM_000607	ORM1
NM_003068	SNAI2
NM_015261	NCAPD3
NM_024636	STEAP4

## Sheet: AndrogenPCa.RMA-GENE-CORE
Gene Accession	Gene Symbol	Present in previously published dataset (1=Nelson; 2=Velasco; 3=Segawa; 4=Xu; 5=dePrimo; 6=Li; 7=Ngan)								Comment	Previously known related genes	Fold change			Function	Processes
		1	2	3	4	5	6	7	Total			Predicted	p(t.test)	Observed
NM_004996	ABCC1			1				1	2			1.93655	5.33141e-06
NM_005845	ABCC4	1				1		1	3			2.45357	1.07075e-07
NM_152924	ABHD2							1	1			1.50629	3.29246e-06		-	-
NM_152924	ABHD2			1		1		1	3			1.50629	3.29246e-06
NM_138340	ABHD3						1	1	2			1.63696	2.66836e-05		-	-
NM_002313	ABLIM1	1				1		1	3			-1.7854	2.57727e-05
NM_014384	ACAD8						1	1	2			2.15765	6.20328e-06		acyl-CoA dehydrogenase activity	lipid metabolic process
NM_004457	ACSL3					1		1	2			2.76979	9.40387e-07
NM_021723	ADAM22								0			-1.83135	1.21041e-05		integrin binding / metalloendopeptidase activity / protein binding / zinc ion binding	central nervous system development / -ve regulation of cell adhesion / proteolysis
NM_006988	ADAMTS1	1				1		1	3			1.09954	0.00018387
NM_021116	ADCY1							1	1			-1.38185	0.000356932		Ca and calmodulin- responsive adenylate cyclase activity / calmodulin binding / Mg ion binding	cAMP biosynthetic process / hormone-mediated signaling / long-term memory
NM_016824	ADD3		1			1			2			-2.02929	0.00029809
NM_031284	ADPGK								0			1.05988	7.58413e-05		-	-
NM_001025	AFF3						1	1	2			1.2536	0.000142028		-	multicellular organismal development
NM_006408	AGR2							1	1			2.22275	6.80699e-05		-	-
BC090889	AHNAK2								0			-2.88173	0.000178455		protein binding	keratinization
NM_000693	ALDH1A3	1		1		1		1	4			1.3999	1.45863e-05
NM_173511	ALS2CR13								0			-1.4153	1.56365e-05		-	-
NM_001147	ANGPT2						1	1	2			1.77786	4.95421e-06		-	-
NM_054027	ANKH	1				1		1	3			1.52331	1.96709e-06
NM_019046	ANKRD16								0			-1.72784	1.02727e-05		-	-
NM_181726	ANKRD37								0			1.91449	8.68646e-05		-	-
NM_152788	ANKS1B								0			-1.0627	5.47124e-05		-	-
NM_032208	ANTXR1							1	1			-1.47788	2.62587e-05		metal ion binding / protein binding / receptor activity	-
NM_003568	ANXA9							1	1			-1.78872	1.7293e-06		AchR activity / Ca ion binding / Ca-dependent phospholipid binding / phospatidylserine binding / protein homodimerisation activity	cell-cell adhesion
NM_005503	APBA2								0			-1.02543	5.14441e-05		protein binding	nervous system development
NM_006380	APPBP2	1				1		1	3			1.63757	6.07898e-06
NM_001660	ARF4				1	1			2			1.1836	0.000403587
NM_014570	ARFGAP3								0		ARF4	1.42104	0.000124611		ARF GTPase activator activity; protein transporter activity	intracellular protein transport; protein secreation; vesicle-mediated transport
NM_012402	ARFIP2								0		ARF4	1.01325	1.99506e-06		GTP binding; GTP-dependent protein binding; Rac GTPase binding	actin cytoskeleton organisation; cell motion; lamellipodium assembly; ruffle organisation; small GTPase mediated signal transduction
NM_033515	ARHGAP18							1	1			-1.49828	0.000403645		GTPase activator activity / protein binding	signal transduction
NM_004815	ARHGAP29								0			-1.41306	9.35443e-05		GTPase activator activty / Rho GTPase activator activity / diacylglycerol binding / metal ion binding / Zn ion binding	rho protein signal transduction / intracellular signalling cascade
NM_006010	ARMET					1		1	2			1.11639	0.000450438
NM_014109	ATAD2					1		1	2			2.54478	2.82422e-06
NM_173694	ATP11C								0			-1.58873	0.000186617		-	-
NM_001677	ATP1B1								0			-1.19831	1.87654e-05		K ion binding / protein binding / Na ion binding / Na:K exchanging ATPase activity	ATP biosynthetic process / ion transport / K ion transport / response to hypoxia / Na ion transport
NM_001185	AZGP1	1						1	2			1.22056	0.000426593
NM_004048	B2M	1				1			2			1.18905	6.55404e-05
NM_012342	BAMBI		1					1	2			-2.0518	0.000233133
NM_000465	BARD1			1		1		1	3			-1.08772	0.000108019
NM_001008	BCAP29						1	1	2			1.615	0.000129901		-	-
NM_177455	BHLHB8								0			2.31103	6.11286e-05		-	-
NM_001165	BIRC3							1	1			-1.08838	0.000340262		metal ion binding / protein binding / ubiquiting-protein ligase / Zn ion binding	anti-apoptosis / cell surface receptor link signal trandsuction / regulation of apoptosis
NM_001203	BMPR1B								0			1.59826	3.86698e-06		ATP binding; SMAD binding	BMP signaling pathway; cartilage condensation; limb morphogenesis; ovarian cumulus expansion; ovulation cycle; positive regulation of bone mineralization
NM_015415	BRP44					1			1			1.13086	0.000172682
NM_000060	BTD			1		1			2			-1.18715	0.000106892
NM_006763	BTG2		1						1			-1.41809	1.29184e-05
NM_147147	BVES								0			-1.0544	0.000264849		muscle development	-
NM_145231	C14orf143							1	1	Validated		-2.00786	3.597e-07	-2.1	Ca ion binding	-
NM_024496	C14orf4							1	1			-1.09891	5.80865e-05		-	-
AK123193	C16orf61								0			1.2727	0.000403214		-	-
AK125514	C17orf28								0			1.31838	1.2406e-06		-	-
NM_019107	C19orf10								0			1.2136	0.00044188		-	-
NM_023938	C1orf116						1		1			1.58321	4.3894e-07		-	-
NM_030806	C1orf21					1			1			1.81511	3.19427e-06
AK000128	C1orf26								0			1.36859	0.000411228		-	-
NM_001733	C1R								0			-1.26559	4.87604e-06		Ca ion binding / peptidase activity / serine-type endopeptidase activity	complement activation, classical pathway / innate immune response / preteolysis
NM_015701	C2orf30					1			1			1.34067	8.29501e-05
NM_025000	C2orf37								0			-1.09078	0.000349595		-	-
AK095400	C3orf58								0			2.22304	0.00011108		-	-
NM_004772	C5orf13			1		1			2			-1.68643	4.32688e-06
AK090558	C5orf30							1	1			-1.84201	2.16877e-05		-	-
NM_052831	C6orf192								0			-1.64286	1.26041e-05		-	transport
NM_014165	C6orf66								0			-1.02652	0.000156229		-	-
NM_021945	C6orf85								0			1.10226	0.000128713		-	-
NM_152793	C7orf41								0			-1.28456	5.52344e-05		-	-
AK225643	C8orf32							1	1			1.44031	1.61775e-05		-	-
AL136588	C8orf57								0			-3.71955	0.000419808		Ca ion binding / enzyme activator activity / metalloendopeptidase activity / peptidase / Zn ion binding	collagen catabolic process / metabolic process / proteolysis
NM_153045	C9orf91								0			1.15994	0.000148334		-	-
NM_001218	CA12					1			1			-1.82706	2.95212e-05
NM_138375	CABLES1							1	1			-1.35722	0.000512919
NM_201571	CACNB2								0			-1.31862	0.000128426		Ca ion binding / voltage-gated Ca channel activity / voltage-gated ion channel activity	Ca ion transport / ion transport / neuromuscular junction development
NM_017954	CADPS2							1	1			1.39647	0.000156809		protein binding	positive regulation of exocytosis
NM_033138	CALD1		1	1					2			-1.33031	8.02043e-05
NM_001219	CALU					1		1	2			1.19302	0.000161076
NM_001220	CAMK2B							1	1			-1.01507	0.000384326		-	-
NM_172127	CAMK2D								0		CAMK2B, CAMK2N1, CAMKK2	-2.03052	3.33787e-06		ATP binding / calmodulin binding / calmodulin-dependent protein kinase activity / nucleotide binding / transferase binding	G1/S transition of mitotic cell cycle / Ca ion transport / cardiac muscle contraction / protein a.a auto/phosphorylation / regulation of cell growth
NM_018584	CAMK2N1					1		1	2			-3.59102	1.34684e-08
NM_006549	CAMKK2	1						1	2			2.01767	9.68466e-08
NM_138793	CANT1								0			1.07806	9.90488e-05		signal transducer activity	positive regulation of I-kappaB kinase/NF kappaB cascade
NM_004930	CAPZB						1		1			1.17279	5.16694e-05
NM_005093	CBFA2T2								0			-1.03019	1.63441e-05		protein binding	-
NM_024814	CBLL1							1	1			1.91191	5.1777e-05		protein binding; ubiquitin-protein ligase activity	negative regulation of cell adhesion; positive regulation of cell migration; positive regulation of endocytosis
NM_182511	CBLN2							1	1			-3.31853	4.87159e-09		-	-
BX649042	CCDC141								0			2.39873	9.71119e-06		-	-
NM_207406	CCDC4								0			1.02336	0.00010748		-	-
NM_004354	CCNG2		1			1			2			-1.71382	3.4592e-07
NM_018719	CDCA7L						1		1			-1.38603	0.000156865		-	regulation of txn, DNA dependent / txn
NM_177980	CDH26								0			-1.38016	5.03088e-06		Ca ion binding / protein binding	cell adhesion / homophilic cell adhesion
NM_001259	CDK6								0			1.45287	1.76666e-05		cyclin binding	cell differentiation; G1 phase of mitotic cell cycle; gliogenesis; regulation of epithelial cell proliferation; negative regulation of osteoblast differentiation; positive regulation of cell-matrix adhesion; positive regulation of fibroblast proliferation; regulation of erythrocyte differentiation; regulation of gene expression
NM_016952	CDON								0			-1.37127	3.62164e-06		protein binding	cell adhesion
NM_152342	CDYL2						1		1			1.06653	0.000161731		-	-
NM_018455	CENPN					1	1	1	3			3.5969	8.52801e-06
NM_032866	CGNL1								0			-1.04382	5.62708e-05		-	-
NM_018371	ChGn						1	1	2			3.62746	4.6242e-07		glucuronosyltransferase activity; metal ion binding; peptidoglycan glycosyltransferase activity	anatomical structure morphogenesis; cell proliferation; cell recognition; biosynthetic pathways, extracellular matrix organisation, nervous system development, metabolic processes
NM_001277	CHKA			1					1			1.22386	0.000468131
NM_001821	CHML								0			-1.68348	7.73217e-07		GTPase activator activity / Rab-protein geranylgeranyltransferase activity	intracellular protein transport / regulation of GTPase activity / visual perception
NM_000742	CHRNA2								0			2.74487	7.80814e-05
NM_004854	CHST10								0			-1.01421	0.000148604		sulfotransferase activity	cell adhesion
NM_199328	CLDN8								0			2.34083	1.05411e-05		identical protein binding	calcium-independent cell-cell adhesion
NM_014927	CNKSR2								0			1.44159	0.000280881		protein binding	-
NM_173515	CNKSR3								0			-1.34534	0.000389942		protein binding	regulation of signal transduction
NM_130386	COLEC12							1	1			-2.0801	3.53031e-05		binding / Ca ion binding / galactose binding / low density lipoprotein binding / pattern recognition receptor activity / scavenger receptor activity / sugar binding	carbohydrate mediated signaling / innate immune response / phagocytosis, recog / protein homooligomerisation
NM_016128	COPG								0			1.05611	9.10344e-06
NM_014912	CPEB3							1	1			1.43053	2.74097e-05		-	-
NM_001308	CPN1								0			1.51765	0.000486096		metallocarboxypeptidase activity	-
NM_130898	CREB3L4							1	1			1.89515	2.89583e-05
NM_024324	CRELD2								0			1.24325	0.000198659		-	-
NM_031476	CRISPLD2								0			1.42386	8.62967e-06		-	-
NM_001012	CTBP1	1						1	2			-1.72608	0.00011554
NM_001008	CXCR4							1	1			1.05611	0.00036259		actin binding; C-X-C chemokine receptor activity; coreceptor activity; G-protein coupled receptor activity; myosin light chain binding; protein binding	activation of MAPK activity; apoptosis; chemotaxis; elevation of cytosolic calcium ion concentration; G-protein coupled receptor protein signaling pathway; immune response; inflammatory response; response to virus
AK001040	CXorf57								0			-1.26938	4.83339e-05		-	-
NM_153611	CYBASC3								0			-1.23075	9.38753e-07
NM_001037	CYFIP2			1			1	1	3			-1.1592	1.82988e-05
NM_183075	CYP2U1								0			2.57057	2.82113e-06		-	-
NM_014392	D4S234E			1					1			-1.05328	0.000250024
NM_020548	DBI	1	1	1	1			1	5			2.73316	5.1232e-05
NM_000790	DDC	1	1	1				1	4	Validated		-2.03294	1.72152e-05	-7.16
NM_003887	DDEF2					1		1	2			-1.44878	8.51279e-07
NM_019058	DDIT4								0			-1.06533	0.00036996		-	apoptosis / -ve regulation of signal transduction
NM_014314	DDX58								0			-1.04909	0.000330964		ATP binding / ATP-dependent helicase / RNA binding / helicase / hydrolase / nucleotide binding / protein binding	innate immune response / response to virus
NM_022783	DEPDC6								0			-1.96449	2.55861e-06		protein binding	intracellular binding
NM_016041	DERL2								0			1.15118	6.07224e-05		protein binding	endoplasmic reticulum unfolded protein response; ER-associated protein catabolic process; positive regulation of cell growth; retrograde protein transport, ER to cytosol
NM_032564	DGAT2							1	1			-1.4984	2.24918e-06		2-acylglycerol O-acyltransferase activity / acyltransferase activity / diacylglycerol O-acyltransferase activity / transferase activity	glycerol metabolic process / lipid biosynthetic process / triacylglycerol biosynthetic process
NM_201444	DGKA								0		DGKH	1.02452	0.000227238		diacylglycerol kinase activity	intracellular signaling cascade
NM_178009	DGKH						1		1			-1.51417	0.000232817		diacylglycerol binding / diacylglycerol kinase activity / metal ion binding / transferase activity / Zn ion binding	activation of PKC activity / intrcellular signalling cascade
NM_014762	DHCR24	1	1	1	1	1		1	6			1.41937	6.98571e-06
NM_006729	DIAPH2								0			-1.21935	0.000390618		Rho GTPase binding / actin binding / receptor binding	actin cytoskeleton organisation / cell diff / cellular component organisation / cytokinesis / multicellular organisaml develpoment / oogenesis
NM_133375	DIS3L								0			-1.17461	1.784e-05		RNA binding / exonuclease / hydrolase / ribonuclease	-
NM_015263	DMXL2								0			-1.18756	0.000293848		Rab GTPase binding / translation initiation factor activity	translation initiation
NM_012328	DNAJB9	1				1		1	3			1.96071	1.18148e-05
NM_018981	DNAJC10					1	1	1	3			1.47669	1.65623e-05
NM_021233	DNASE2B								0			1.25469	6.07359e-05		endodeoxyribosenuclease activity	-
NM_001386	DPYSL2					1		1	2			-1.47093	0.000377268
NM_032160	DSEL								0			-2.38132	0.00014349		-	-
NM_016448	DTL								0			-1.27656	0.000196067		protein binding	DNA replication / response to DNA dmg stimuli / ubiquitin-dependent protein catabolic process
NM_018456	EAF2							1	1			3.59469	1.19148e-06
---	EBP								0			1.00798	0.000365142		drug transporter activity; steroid delta-isomerase activity; transmembrane receptor activity.	skeletal system development
NM_030796	ECOP								0			-1.11594	4.04857e-05		-	-
NM_014674	EDEM1								0		EDEM3	1.34397	5.54536e-05		protein binding	ER-associated protein catabolic process
NM_025191	EDEM3						1		1			1.7033	2.65779e-05		-	-
NM_012152	EDG7						1		1			2.44909	3.86376e-06		G-protein coupled receptor activity; lipid binding	elevation of cytosolic calcium ion concentration; G-protein signaling, coupled to cyclic nucleotide secnd messenger; synaptic transmission
NM_012081	ELL2	1	1			1		1	4			2.31999	2.44549e-07
NM_001008	EML1								0			1.07063	3.99083e-05		calcium ion binding	-
NM_183387	EML5								0			-1.50962	1.49162e-06		-	-
NM_003633	ENC1							1	1			-1.72962	1.51583e-06		actin binding / protein binding	multicellular organismal development / nervous system development / ubiquitin-dependent protein catabolic process
NM_021572	ENPP5					1			1			-1.81169	4.87341e-06
NM_005233	EPHA3		1						1			-1.11223	0.000191921
NM_016570	ERGIC2					1			1			1.31827	5.68435e-05
NM_001433	ERN1							1	1			1.36089	7.49326e-05		ATP binding; magnesium binding; protein binding; protein serine/threonine kinase activity	activation of signaling protein activity involved in unfolded protein response; cell cycle arrest; induction of apoptosis; protein amino acid phosphorylation; protein modification process
NM_018948	ERRFI1						1		1	Validated		3.79463	1.851e-07	1.26	Rho GTPase activator activity	response to stress
NM_130398	EXO1								0			-1.24294	0.000148401		endo/exonuclease activity	DNA repair
NM_015065	EXPH5								0			-2.03619	0.000320848		Rab GTPase binding / protein binding	intracellular protein transport
NM_001992	F2R								0			-1.7942	9.13232e-05		G-protein coupled receptor activity / receptor activity / receptor binding / thrombin receptor activity	capase activation / -ve regulation of cell proliferation / STAT protein nuclear translocation / anatomical structure morphogenesis / platlet activation / +ve regulation of JAK-STAT cascade / +ve regulation / =VE regulation of txn, DNA dependent
NM_000130	F5						1		1			2.01312	9.27015e-06		-	blood coagulation
NM_013402	FADS1					1			1			1.50879	6.10404e-07
AL512750	FAM105A							1	1			3.16342	3.93646e-06		-	-
BC062456	FAM111B								0			1.67517	9.22292e-05		-	-
NM_052966	FAM129A								0			1.09446	0.000274106		-	regulation of protein amino acid phosphorylation; positive regulation of translation; response to endoplasmic reticulum stress
NM_001034	FAM134B								0			-1.41092	6.43677e-05		-	-
NM_004104	FASN			1					1			1.58847	0.000104199
NM_012164	FBXW2							1	1			1.03301	8.8003e-05		protein binding; ubiquitin protein ligase activity	protein modification process; proteolysis
NM_014824	FCHSD2								0			-1.32596	1.57261e-06		-	-
NM_004462	FDFT1			1				1	2			1.30094	0.000110214
NM_022116	FIGNL1								0			-1.66105	0.000114398		ATP binding / hydrolyase activity / Mg ion binding / nucleoside-triphosphatase activity / nucleotide binding	ATP metabolic process
NM_004117	FKBP5	1	1	1	1	1		1	6			4.0102	3.1213e-08
NM_207429	FLJ45803								0			-2.36294	2.90765e-07		-	-
NM_212482	FN1	1							1			-1.49999	2.43562e-05
NM_004958	FRAP1								0			1.52119	1.15052e-05		kinase activity; phosphorylation binding; protein serine/threonine kinase activity	cell growth; phosphorylation; protein catabolic process; response to nutrient; signal transduction;
NM_002031	FRK							1	1			1.04377	3.73273e-05		non-membrane spanning protein tyrosine kinase activity	negative regulation of cell proliferation; protein amino acid phosphorylation
NM_178154	FUT8								0			-1.5959	0.000139076		Rab GTPase binding / protein binding	L-fucose catabolic process / N-glycan processing / cell migration . . . . .
NM_017412	FZD3					1		1	2			-2.10599	2.12886e-06
NM_003468	FZD5								0			2.52722	1.3401e-06		-	establishment of tissue polarity
NM_006705	GADD45G							1	1			2.89198	8.55494e-06		protein binding	activation of MAPKK activity; negative regulation of protein kinase activity; regulation of cell cycle
NM_001001	GALK2								0			1.25058	6.02021e-05		galactokinase activity	-
NM_198321	GALNT10							1	1			-1.10478	3.43151e-05		Ca ion binding / Mn ion binding / polypeptide N-acetylgalactosaminyltransferase / suagr binding	protein a.a O-linked glycosylation
NM_032293	GARNL3							1	1			-1.0817	0.000417373		GTPase activator / small GTPase activator	regulation of small GTPase mediated signal transduction
NM_032638	GATA2		1						1			-1.48411	3.56883e-06
NM_000163	GHR		1					1	2			1.11322	0.000199438
NM_015660	GIMAP2								0			-1.21367	7.10711e-05		GTP binding / nucleotide binding	-
BC012542	GINS1								0			-1.11772	7.61639e-06		protein binding	DNA rep / inner cell mass cell proliferation
NM_015554	GLCE								0			-1.31679	0.000214111		-	-
NM_012084	GLUD2							1	1			1.51118	1.01108e-05		glutamate dehydrogenase activity	glutamate metabolic process; oxidation reduction
NM_145016	GLYATL2								0			1.80294	0.00011852		-	-
NM_205847	GMPPA								0		GMPPB	1.47836	4.59285e-05		-	-
NM_013334	GMPPB							1	1			1.30904	7.14477e-05		mannose-1-phosphate guanylyltransferase activity	-
NM_018960	GNMT	1						1	2			2.4786	3.27213e-06
NM_002078	GOLGA4							1	1			1.13937	0.000390258		-	vesicle-mediated transport
NM_020918	GPAM								0			-1.13632	0.000164299
NM_020455	GPR126							1	1			-1.79652	5.53767e-05		G-protein coupled receptor activity	neuropeptide signalling pathway
NM_003272	GPR137B							1	1			-1.54019	2.35346e-06		-	-
NM_014373	GPR160							1	1			-1.27858	0.000401054		G-protein coupled receptor activity / receptor activity	G-protein coupled receptor protein signaling pathway / signal transduction
NM_024911	GPR177							1	1			-1.35859	9.78386e-06		receptor actvity / signal transducer activity	+ve regulation of I-kappaB kinase/NF-kappaB cascade
NM_030784	GPR63								0		GPR 126, GPR137B, GPR160, GPR177	-2.07416	2.63638e-05		G-protein coupled receptor activity / molecular function / protein binding / receptor activity	G-protein coupled receptor protein signalling pathway / biological processes / signal transduction
NM_032119	GPR98								0		GPR 126, GPR137B, GPR160, GPR177	-1.34949	6.02845e-05		G-protein coupled receptor activity / Ca ion binding / protein binding	cell-cell adhesion / detection of mechanical stimuli involved in sensory perception / inner ear development / maintenance of organ identity / nrvs system development / neurological system process / neuropeptide signaling pathway / photoreceptor cell maintenance / response to stimuli
NM_017577	GRAMD1C							1	1			-1.77925	1.31697e-05		-	-
NM_001001	GRB10							1	1	Validated		-2.46851	5.66312e-07	-7.65	SH3/SH2 adaptor activity / protein binding	cell-cell signaling / insuling receptor signaling pathway / signal transduction
NM_014668	GREB1							1	1			2.20561	6.69132e-06		#N/A	#N/A
NM_014552	GRHL1								0			1.42108	2.22493e-05		-	-
NM_175611	GRIK1								0			-1.59509	3.10955e-07		ion channel activity / protein binding / receptor activity	behavioral pain response / CNS development / ion transport
NM_015917	GSTK1								0			-1.04216	0.000415783		identical protein binding	-
NM_002095	GTF2E2					1			1			1.13064	0.000201764
NM_012260	HACL1								0			-1.36785	0.00024229		C-C lyase activity / identical protein binding / Mg ion binding / thiamin pyrophosphate binding	f.a alpha oxidation / lipid metabolic process
NM_182765	HECTD2								0			-1.13901	0.000352379		-	-
NM_014606	HERC3	1	1	1		1			4			2.05525	3.65724e-05
NM_001010	HERPUD1								0			1.13924	2.62236e-06		protein binding	response to unfolded protein
NM_003537	HIST1H3B								0			-1.84794	2.60151e-05		-	-
NM_003071	HLTF		1						1			-1.05213	2.81134e-05
NM_178580	HM13								0			1.1037	2.7894e-07		protein binding	-
NM_000859	HMGCR		1	1		1			3			1.18062	7.51761e-06
NM_001098	HMGCS1	1						1	2			1.80587	3.4391e-05
NM_199330	HOMER2	1					1	1	3			1.55084	1.09933e-05
NM_000860	HPGD	1						1	2			3.45772	1.71737e-05
NM_005114	HS3ST1					1		1	2			1.91798	8.40932e-06
NM_014278	HSPA4L								0			-1.91537	2.77318e-05		ATP binding / nucleotide binding / protein binding	protein folding / response to unfolded protein
NM_007076	HYPE							1	1			2.18133	3.44103e-06		protein binding	-
NM_004508	IDI1	1		1		1		1	4			1.72254	1.93399e-06
NM_000875	IGF1R	1							1			2.80805	1.90661e-06
NM_002182	IL1RAP								0			-1.12859	4.68145e-05		IL1 receptor / protein binding / transmembrane receptor	inflammatory response / innate immune response / protein complex assembly / signal transduction
NM_173842	IL1RN							1	1			-2.04739	0.000488938		cytokine activity / IL1 receptor antagonist activity / protein binding	immune response / inflammatory response /
NM_000884	IMPDH2				1				1			-1.10487	8.74197e-05
NM_003866	INPP4B	1							1			2.63493	1.87085e-07
NM_198336	INSIG1							1	1			2.39326	1.21162e-06		protein binding	cell proliferation; metabolic process
NM_018142	INTS10					1		1	2			1.27343	0.000306461
NM_006633	IQGAP2	1				1		1	3			1.11791	0.000221993
NM_178827	IQUBIQ								0			2.02545	0.000319507		-	-
NM_002203	ITGA2								0		ITGAV	-1.65156	6.35444e-06		Ca ion binding / collagen binding / identical protein binding / Mg ion binding / receptor activity	bld coagulation / cell ashesion / cell-matric adhesion / integrin-mediated signalling pathway / organ morphogenesis
NM_002210	ITGAV	1				1			2			1.38438	1.54093e-05
NM_003636	KCNAB2								0		KCNMA1, KCNN2, KCNS3	-1.08452	2.22617e-05		ion channel / oxidoreductase / K channel regulator / K ion binding / voltage gated K ion channel	ion transport / oxidation reduction / K ion transport
NM_002247	KCNMA1							1	1			1.55887	1.23016e-06		calcium-activated potassium channel activity; voltage gated potassium channel activity	-
NM_021614	KCNN2							1	1			1.44041	1.79961e-05		small conductance calcium-activated potassium channel activity	-
NM_002252	KCNS3							1	1			-1.41689	9.9141e-06		delayed rectifier K channel activity / K channel regulator activity / K ion binding / protein binding / voltage-gated ion channel activity	ion transport / K ion transport
NM_016121	KCTD3					1		1	2			1.50743	2.16373e-05
NM_006854	KDELR2					1		1	2			1.09682	0.000312934
NM_006558	KHDRBS3								0	Validated		-1.08659	0.000537108	-3.49	RNA binding / SH£ binding / protein binding	regulation of txn, DNA-dependent / spermatodenesis / txn
---	KIAA0247							1	1			-1.42454	3.50769e-05		-	-
NM_000899	KITLG								0			-1.5934	0.000147395		growth factor activity / stem cell factor receptor binding / identical protein binding	cell adhesion / hemopoiesis / -ve regulation of apoptosis / +ve regulation of DNA replication / +ve regulation of MAPK activity / +ve regulation of Ras protein signal transduction / +ve regulation of cell proliferation / +ve regulation of melanocyte diff / +ve regulation of myeloid leukocyte diff / +ve regulation of peptidyl-tyrosine phosphorylation
NM_005655	KLF10		1						1			-1.06091	0.000405853
NM_004235	KLF4	1				1			2			1.04742	6.57634e-05
NM_144711	KLHL23								0			-1.27331	0.000226025		-	-
NM_144711	KLHL23								0			-1.27331	0.000226025		-	-
NM_001002	KLK2	1						1	2			2.53796	1.07135e-08
NM_001030	KLK3	1						1	2			1.82448	1.34645e-07
NM_004917	KLK4	1						1	2			1.14774	0.00013121
NM_002273	KRT8	1		1		1		1	4			2.13194	4.96394e-06
NM_002293	LAMC1		1	1					2			1.16078	0.000159086
NM_002298	LCP1			1		1		1	3			1.93944	3.76702e-06
NM_000527	LDLR								0			1.91364	1.08759e-06		low-density lipoprotein receptor activity, transmembrane receptor activity	cholesterol absorption, cholesterol transport, endocytosis, lipid metabolic process and clearance
NM_006499	LGALS8					1			1			-1.25447	1.04333e-05
NM_002309	LIF			1					1			-1.27308	0.000247648
NM_002310	LIFR	1	1	1		1		1	5			3.31235	1.87473e-06
NM_153371	LNX2								0			-1.16376	0.000228221		metal ion binding / protein binding / Zn ion binding	-
NM_207446	LOC400451							1	1			1.09241	6.22553e-06		-	-
NM_024770	LOC728937								0			-1.79923	0.000349881		-	-
NM_024770	LOC728937								0			-1.79923	0.000349881		-	-
NM_030941	LOC81691							1	1			1.64202	0.000317976		-	-
AY358497	LOC89944								0			1.58728	6.59746e-07		-	-
NM_152271	LONRF1					1		1	2			2.70463	3.42733e-05
NM_145693	LPIN1								0			1.09937	1.11235e-05		-	-
NM_006726	LRBA					1			1			-1.42779	7.2864e-05
NM_015116	LRCH1								0			1.54475	7.79547e-05		-	-
NM_015541	LRIG1					1			1			1.81332	5.96166e-06
NM_153377	LRIG3							1	1			-1.50575	1.67127e-05		protein binding	-
NM_017640	LRRC16							1	1			1.56467	3.71464e-05		-	-
NM_017691	LRRC49								0			-1.11612	0.000398994
NM_018509	LRRC59								0			1.28963	1.31226e-05		protein binding	-
NM_019594	LRRC8A								0			1.11201	5.113e-05		-	-
NM_006309	LRRFIP2					1		1	2			1.51515	3.24197e-05
NM_020873	LRRN1							1	1			-4.29792	1.07143e-05		-	-
NM_001009	LUZP2						1		1			-1.40307	0.000112741		-	-
NM_002350	LYN								0			-1.49743	0.000124843		ATP binding / non-membrane spanning protein tyrosine kinase activity / nucleotide binding / protein binding / receptor signaling protein tyrosine kinase activity / transferase activity	erythrocyte diff/ /interspecies interaction between organisms / + regulation of cell proliferation and of tyrosine phosphoylation og STAT protein / protein a.a phosphorylation / response to human stimuli / signal transduction
NM_001031	MAF	1						1	2			1.72999	8.20193e-05
NM_005906	MAK							1	1			1.75609	0.000204441		-	-
NM_173844	MALT1							1	1			1.65473	0.000176653		cysteine-type endopeptidase activity; kinase activator activator; protein self-association; signal transducer activity; ubiquitin-protein ligase activity	anti-apoptosis; defense response; nuclear export; positive regulation f T cell cytokine production; regulation of apoptosis; cell receptor signalling pathway
NM_005907	MAN1A1								0			-2.27534	4.54544e-06		Ca ion binding / hydrolase activity, acting on glycosyl bonds / mannosidase activity / mannosyl-oligosaccharide-1,2-alpha-mannosidase activity	metabolic process
NM_005908	MANBA							1	1			-1.31194	3.54556e-05		beta-mannosidae activity / cation binding / hydrolyase activity, hydrolysing O-glycosyl compounds	carbohydrate metabolic process / glycoprotein catabolic process / metabolic process / protein mods process
NM_024641	MANEA						1	1	2	Validated		-3.09995	2.51441e-06	-1.48	alpha-mannosidae activity	-
NM_003010	MAP2K4							1	1			1.27641	7.5089e-05		protein binding	JNK cascade; signal transduction
NM_002758	MAP2K6								0			-2.02754	3.30477e-06		ATP binding / MAP kinase kinase activity / nucleotide binding / protein binding / protein kinase activity / protein kinase activity / protein serine/threonine kinase activity / protein tyrosine kinase activity / transferase activity	DNA dmg induced protein phosphorylation / activation of MAPK activity / cell cycle arrest
NM_018067	MAP7D1							1	1			1.31047	5.59081e-05		-	-
NM_002748	MAPK6					1		1	2			1.03057	0.000410742
NM_017923	MARCH1								0		MARCH5	-1.00673	0.000115632		-	-
NM_017824	MARCH5							1	1			1.19391	1.06304e-05
NM_203377	MB						1		1			-1.09886	1.04221e-05
NM_138799	MBOAT2					1			1			2.65014	1.19792e-06
NM_022132	MCCC2					1		1	2			1.08733	0.000327792
NM_006343	MERTK	1				1		1	3	Validated		2.77067	5.02042e-07	1.96
NM_012214	MGAT4A								0			-1.10414	0.000204934		metal ion binding / transferase activity	N-glycan processing / carbs metabolic processing
NM_000381	MID1							1	1			-1.48519	0.000184297		ligase activity / metal ion binding / protein binding / Zn ion binding	microtubule cytoskeleton organisation / -ve regulation of microtubule depolymerisation / pattern specification process / ubiquitin-dependent protein catabolic process
NM_013255	MKLN1					1			1			1.30175	0.000102435
NM_024101	MLPH						1	1	2			1.50031	9.79486e-06		myosin binding, protein binding, Rab GTPase binding.	melanocyte differentiation; melanosome localization; pigmentation; protein targeting
NM_172250	MMAA								0			1.49853	9.29069e-06		-	-
NM_005941	MMP16	1	1	1		1		1	5	Validated		-3.79599	3.62413e-07	-6
NM_022782	MPHOSPH9					1		1	2			2.15168	4.12035e-05
NM_018135	MRPS18A							1	1			1.39151	2.97341e-05		structural consituent of ribosome	translation
#VALUE!	MTMR9					1	1	1	3			2.1769	9.56558e-07
NM_152423	MUM1L1								0			1.43358	0.000560295		-	-
NM_002467	MYC	1	1	1					3			-1.81794	1.25142e-05
NM_018946	NANS							1	1			1.51618	3.10302e-06		N-acylneuraminate cytidyltranserase activity	lipopolysaccharide biosynthetic process
NM_004538	NAP1L3		1					1	2			-1.1845	0.00036031
NM_198990	NAPE-PLD								0			-1.26892	1.96085e-05		hydrolyase activity / metal ion binding / Zn ion binding	lipid metabolic process / phospholipid catabolic process
NM_000662	NAT1								0			2.20531	1.27063e-05		arylamine N-acetyletransferase	-
NM_020443	NAV1								0			-1.18032	2.30335e-05		nucleoside-triphosphatase activity / nucleotide binding	cell diff / nrvs system development / multicellular organismal development
NM_015261	NCAPD3						1	1	2	Validated		4.4256	4.84911e-07	1.52	-	mitotic chromosome condensation
NM_181782	NCOA7								0			-2.5221	4.39782e-05		protein binding / receptor activity	cell wall catabolic process / regulation of txn, DNA-dependent / txn
NM_019080	NDFIP2								0			2.10115	0.000301431		signal transducer activity; WW domain binding	positive regulation of I-kappaB kinase/NF-kappaB cascade
NM_006096	NDRG1	1	1	1		1		1	5			3.45718	2.908e-09
NM_012224	NEK1							1	1			-1.29143	0.000165941		ATP binding / Mg ion binding / nucleotide binding / protein binding / protein serine/threonine kinase activity / protein tyrosine kinase activity / transferase activity	cell cycle / cell division / mitosis / protein a.a phophorylation
NM_014397	NEK6						1		1			-1.05069	1.82679e-05		ATP binding / Mg ion binding / nucleotide binding / protein binding / protein serine/threonine kinase activity / protein tyrosine kinase activity / transferase activity	apoptosis / cell cycle / cell division / chromosome seg / mitosis
NM_020529	NFKBIA		1			1			2			1.25247	4.80215e-05
NM_006165	NFRKB						1		1			-1.24482	0.000109706		DNA binding / specific RNApol2 txn factor activity	inflammatory response / txn from RNApol2 promoter
NM_004148	NINJ1			1					1			-1.15431	0.000103462
NM_014932	NLGN1								0			-1.80023	1.1223e-05		neuexin binding	Ca-dependent cell-cell adhesion / cell adhesion / protein targetting / regulation of neuron diff / synaptic vesicle targetting / synaptogenesis
NM_005126	NR1D2								0			-1.64606	0.000141432		ligand-dependent nuclear receptor activity / matal ion binding / sequence-specific DNA binding / steroid hormone receptor activity / zinc ion binding	regulation of txn, DNA dependent / txn
NM_000901	NR3C2								0			-1.55484	2.81099e-05		metal ion binding / protein binding / receptor activity / sequence-specific DNA binding / steroid binding / steroid hormone receptor activity / txn factor activity / Zn ion binding	cellular Na ion homeostasis / excretion / regulation of txn, DNA-dependent / signal transduction / txn
NM_002135	NR4A1			1				1	2			1.38873	2.15465e-05
NM_030952	NUAK2								0			-1.08094	0.000545771		-	-
NM_014089	NUPL1							1	1			1.07331	0.000101909		protein binding	-
NM_001031	OBFC2A						1		1			-1.06245	8.47243e-06		nucleic acid binding	-
NM_002539	ODC1					1		1	2			2.0271	1.94446e-06
NM_000912	OPRK1		1	1				1	3			-2.23515	1.88365e-06
NM_000607	ORM1	1		1				1	3			4.07849	0.000118135
NM_000608	ORM2							1	1			3.28383	0.000112749		-	acute-phase response
NM_053001	OSR2							1	1			-2.10441	2.72296e-07		metal ion binding / nucleic acid binding / zinc ion binding	embryonic skeletal system morphogenesis / +ve regulation of cell proliferation
NM_020205	OTUD7B						1		1			1.31386	9.9199e-05		protein binding	negative regulation of I-kappaB kiniase/NF-kappaB cascade
NM_018026	PACS1								0			1.80767	4.33966e-07		protein binding	-
NM_002576	PAK1								0			-1.23696	1.71849e-07		ATP binding / collagen binding / nucleotide binding / protein serin/threonine kinase activity / transferase activity	ER-nuclear signaling pathway / apoptosis / cytoskeleton organisation / +ve regulation of JNK activity / protein a.a autophosphorylation
NM_017906	PAK1IP1							1	1			2.98232	5.55318e-06		-	-
AK094518	PART1							1	1			2.83845	1.33435e-06		-	-
NM_002585	PBX1					1			1			-2.16421	4.04017e-05
NM_032151	PCBD2								0			-1.24577	2.86863e-06		4-alpha-hydrocytetrahydrobiopterin dehydratase activity / lyase activity / phenylalanine 4-monooxygenase activity / protein binding	+ve regulation of txn / protein hetrooligermerisation / protein homotetramerisation / tetrahydrobiopterin biosynthetic process
NM_018931	PCDHB11							1	1			-1.45017	0.000113587
NM_021213	PCTP					1		1	2			1.59388	8.74238e-05
NM_006810	PDIA5		1	1		1			3			1.5479	1.86256e-05
NM_003768	PEA15					1		1	2			1.13194	2.33045e-05
NM_206836	PECI							1	1			1.21101	5.61922e-06		-	-
NM_021255	PELI2							1	1			-1.33759	0.000200722		protein binding	-
NM_016831	PER3							1	1	No change		-1.98939	2.3566e-07		signal transducer activity	regulation of txn, DNA dependent / signal transduction / txn /
NM_153818	PEX10							1	1			1.748	5.14551e-05		protein binding	peroxisome organization; protein import into peroxisome matrix
NM_006212	PFKFB2						1		1			1.8166	3.13333e-06		6-phosphofructo-2-kinase activity	-
NM_018290	PGM2					1		1	2			1.02334	0.0001116
NM_173582	PGM2L1	1							1			-1.01336	0.000190984
NM_015599	PGM3					1		1	2			1.80923	2.2909e-05
NM_015107	PHF8						1		1			1.05471	1.1018e-05		-	-
NM_006623	PHGDH								0			-1.37412	5.55424e-06		NAD binding / catalytic activity / cofactor binding / electron carrier activity / oxidoreductase activity / phosphoglycerate de hydrogenase activity	L-serine biosynthetic process / a.a biosynthetic process / brain development / metabolic process / oxidation reduction
NM_145753	PHLDB2							1	1			1.35322	0.000270113		-	-
NM_007166	PICALM					1			1			1.23475	0.000179993
NM_002646	PIK3C2B								0		PIK3IP1, PIK3R3	-1.11272	2.73249e-05		inositol or phosphatidylinositol kinase / phosphatidylinositol-4-phosphate 3 kinase / phosphoinositide binding / phosphotransferase `	cell comms / phophoinositide phophorylation
NM_052880	PIK3IP1							1	1			-1.73839	1.20474e-05		-	-
NM_181523	PIK3R1								0		PIK3IP1, PIK3R3	-1.41095	2.17796e-06		Erb-3 class receptor binding / insulin binding . Insulin receptor binding / insulin receptor substrate binding / insulin-like growth factor receptor binding // phospatidylinositol binding / phosphoinositide 3-kinase regulator activity / protein phosphatase binding	B cell diff / insulin recptor signaling pathway / insulin-like growth factor receptor signaling pathway / interspecies interaction between organisms / intracellular signalling cascade / -ve regulation of apoptosis, cell-matrix adhesion, osteoclast diff / phosphoinositide 3-kinase cascade / phosphoinositide phosphorylation / =ve regulation of cell migraion / protein a.a. phosphorylation
NM_003629	PIK3R3	1	1	1				1	4			-1.65635	6.27736e-06
NM_181794	PKIB							1	1			-1.33038	0.000121444		cAMP-dependent protein kinase inhibitor activity / kinase activity / protein kinase inhibitor activity	-ve regulation of protein kinase activity
NM_003628	PKP4								0			-1.16624	3.78915e-05		binding / protein binding	cell adhesion
NM_000300	PLA2G2A		1			1		1	3			-1.57451	0.000455299
NM_002662	PLD1			1					1			-1.23659	0.000311329
NM_012388	PLDN						1	1	2			-1.07075	0.000369912		identical protein binding / syntaxin-13 binding	melanocyte diff / membrane fusion / pigmentation / synaptic vesicle docking during exocytosis
NM_006622	PLK2								0			-1.35845	0.000125956		ATP binding / nucleotide binding / polo kinase kinase activity / protein binding / protein serine/threonine kinase activity / signal transducer activity / transferase activity	mitotic cell cycle / +ve regulation of I-kappaB kinase/NF-kappaB cascade / protein a.a binding
NR_003085	PMS2							1	1			-1.94748	2.13178e-06		DNA binding / endonuclease / ATP binding / hydrolase activity / mismatched DNA activity / protein binding / single base insertion or deletion binding	mismatch repair / -ve regulation of cell cycle / response to DNA dmg stimuli
NM_022490	POLR1E					1			1			-1.08302	0.000345559
NM_018119	POLR3E								0		POLR1E	1.01859	0.000169594		-	-
NM_003711	PPAP2A							1	1			1.39467	0.000152511		phosphatidate phosphatase activity	activation of protein kinase C acitivity by G-protein coupled receptor protein signaling pathway; androgen receptor signaling pathway; cell migration; negative regulation of cell proliferation; phospholipid dephosphorylation; regulation of lipid metabolic process
NM_203453	PPAPDC2								0		PPAP2A	1.51378	1.29327e-06		-	-
NM_003622	PPFIBP1							1	1			1.0972	9.41879e-05		protein binding	cell adhesion
NM_003621	PPFIBP2								0		PPFIBP1	1.40952	0.000225291		-	cell communication
NM_152542	PPM1K							1	1			1.13238	0.00046954		protein serine/threonine phosphatase activity	organ development; negative regulation of apoptosis
NM_002709	PPP1CB					1		1	2			1.372	7.11751e-05
NM_032391	PRAC							1	1			-1.34273	0.000149867		-	-
NM_000946	PRIM1								0			-1.02749	0.000179728		DNA primase activity	DNA replication, synthesis of RNA primer
NM_006252	PRKAA2								0			-1.0337	8.35859e-05		protein binding	protein amino acid phosphorylation; regulation of fatty acid oxidation; signal transduction
NM_002737	PRKCA								0			1.79785	1.55838e-05		protein binding	induction of apoptosis by extracellular signals
NM_006255	PRKCH							1	1			1.55193	3.65995e-05		protein kinase C activity	protein amino acid phosphorylation
NM_002742	PRKD1		1					1	2			-1.11089	1.37035e-06
NM_058179	PSAT1								0			-1.93636	2.50027e-06		phosphoserine transaminase activity / pyridoxal phosphate binding / transferase activity	L-serine biosynthetic process / a.a. biosynthetic process / metabolic process / pyridoxine biosynthetic process
NM_004762	PSCD1								0		PSCD3	1.05352	8.46935e-05		ARF guanylnucleotide exchange factor activity; protein binding	regulation of cell adhesion; vesicle-mediated transport
NM_004227	PSCD3						1		1			-1.37501	9.04211e-06		ARF guanyl-nucleotide exchange factor activity / inositol-1,4,5-triphosphate receptor activity / phophatidylinositol binding	regulation of ARF protein signal transduction / vesicle mediated transport
NM_000958	PTGER4								0			2.68668	4.76946e-06		prostaglandin E receptor activity	G-protein signaling coupled to cAMP nucleotide second messenger; immune response'
NM_005401	PTPN14								0		PTPN9	-1.25161	8.48467e-05		binding / hydrolase activity / protein tyrosine phosphatase activity	protein a.a dephosphorylation
NM_002833	PTPN9					1			1			1.04006	5.57829e-05
NM_002845	PTPRM					1		1	2			1.46447	4.53947e-05
NM_002849	PTPRR		1					1	2			-1.70232	5.86464e-06
NM_005859	PURA		1	1		1			3			-1.18482	5.56507e-06
NM_004580	RAB27A		1	1				1	3			1.91735	0.00022845
NM_002867	RAB3B							1	1			1.79623	2.72437e-06		GTPase activity	-
NM_018845	RAG1AP1								0			1.0433	1.9884e-05		-	positive regulation of gene expression, epigenetic
NM_015577	RAI14								0			-1.71394	5.41382e-06		protein binding	-
NM_016732	RALY								0			1.05833	7.51744e-06
NM_012294	RAPGEF5								0			1.32136	1.31605e-05		GTP-dependent protein binding; Rap guanyl-nucleotide exchange factor activity	nervous system development
NM_170692	RASAL2								0			-1.04691	0.000175339		-	-
NM_182663	RASSF5							1	1			-1.27445	1.62941e-05		diacylglycerol binding / identical protein binding / metal ion binding / protein binding / Zn ion binding	apoptosis / intracellular signaling cascade / -ve regulation of cell cycle / signal transduction
NM_018211	RAVER2								0	Validated		-1.13998	5.28481e-05	-2.69	RNA binding / nucleotide binding	-
NM_006606	RBBP9								0			-1.28212	9.38525e-06		hydrolyase activity	-
NM_013441	RCAN3						1		1			-1.33105	3.27815e-05		RNA binding / toponin I binding	anatomical structure morphogenesis / Ca-mediated signalling
NM_172037	RDH10								0			1.80921	4.83484e-06		retinol dehydrogenase activity	visual perception
NM_173054	RELN								0			-1.25611	0.000134582		Ca ion binding / peptidase activity / protein binding / protein serine/threonine/tyrosine kinase activity / serine-typ peptidase activity / Zn ion binding	celladhesion / cell morphogenesis / glial cell diff / locomotory behaviour
NM_134428	RFX3								0			-1.53784	2.9907e-05		RNA pol II txn factor activity, enhance binding / txn repressor activity	regulation of txn, DNA-dependent / regulation of txn, DNA dependent
NM_015149	RGL1								0			-1.23293	5.0726e-05		Ral guanyl-nucleotide exchange factor activity / protein binding	regulation of small GTPase mediated signal transduction / signal transduction
NM_021205	RHOU						1	1	2			3.04059	1.71173e-08		protein binding	-
NM_182757	RNF144B							1	1			-2.27254	1.31185e-05
NM_017763	RNF43								0		RNF144B	-1.57293	8.97765e-05		metal ion binding / protein binding / Zn ion binding	-
NM_133631	ROBO1								0			-1.18477	6.88425e-05		axon guidance receptor activity / identical protein binding / receptor activity	cell adhesion / cell diff / chemotaxis
U66589 //	RPL5								0			1.23035	0.000135358		protein binding; structural constituent of ribosome	ribosomal large subunit biogenesis; rRNA processing; elongation
NM_015474	SAMHD1								0			-1.34602	4.55048e-05		catalytic activity	immune response
NM_015278	SASH1							1	1			1.30179	2.16661e-05		protein binding	-
NM_002970	SAT1	1				1		1	3			2.36425	1.66995e-06
NM_006745	SC4MOL					1			1			1.52637	4.77914e-05
NM_012235	SCAP		1	1					2			1.62929	3.82699e-07
NM_002998	SDC2								0		SDC4	-1.12375	1.35293e-05		cytoskeletal protein binding	-
NM_002999	SDC4	1	1	1					3			-1.65148	1.15116e-05
NM_022044	SDF2L1								0			1.01629	0.000164177		-	-
NM_012429	SEC14L2							1	1			1.95173	5.20985e-06		phospholipid binding; transcription activator activating; vitamin E binding	positive regulation of transcription, DNA-dependent; regulation of cholesterol biosynthetic process
NM_021982	SEC24A								0		SEC24D	1.03498	0.000119268		-	ER to golgi vesicle mediated transport; membrane organisation
NM_014822	SEC24D	1						1	2			2.33715	8.52159e-08
NM_153618	SEMA6D								0	Validated		-2.81153	2.52414e-06	-4.32	receptor activity	cell differentiation / multicellular development / nervous system development / preassembly of GPI anchor in ER membrane
NM_018243	SEPT11								0		SEPT6	-1.37057	2.27722e-06		GTP binding / nucleotide binding / protein binding	cell cycle / cell division / protein heterooligomerisation
NM_145799	SEPT6							1	1			-1.27709	6.44738e-05		GTP binding / nucleotide binding / `	cell cycle / cytokinesis
NM_014445	SERP1					1		1	2			1.15538	0.000394276
NM_002639	SERPINB5	1						1	2			-1.41306	0.000151802
NM_014454	SESN1					1			1			-1.58372	8.54471e-06
NM_144665	SESN3						1		1			-1.78003	7.26949e-05		-	cell cycle arrest
NM_005627	SGK	1	1	1				1	4	Validated		3.26101	1.19413e-08	1.9
NM_031469	SH3BGRL2								0			-1.00296	0.000510251		SH3/SH2 adaptor activity	-
NM_020870	SH3RF1								0			-1.33599	6.25778e-07		ligase activity / metal ion binding / protein binding / Zn ion binding	-
NM_020859	SHROOM3						1		1			1.18121	2.92637e-05		-	apical protein localization; cell morphogenesis; cellular pigment accumulation; pattern specification process
NM_001041	SI		1	1				1	3			-2.74622	1.74606e-05
NM_003930	SKAP2								0			-1.04721	7.78812e-05
NM_001046	SLC12A2					1		1	2			-1.2183	2.55938e-05
NM_021082	SLC15A2		1					1	2			2.07067	1.11686e-05
NM_152527	SLC16A14								0			-1.10212	5.36123e-05
NM_004694	SLC16A6							1	1			3.65675	1.56119e-06		monocarboxylic acid transporter	monocarboxylic acid transporter
NM_000387	SLC25A20							1	1			1.19613	0.000429464		acyl carnitine transporter activity	carnitine shuttle; regulation of fatty acid oxidation
NM_003645	SLC27A2								0		Many other solute carriers previously identified	-1.95642	0.000481207		catalytic activity / ligase activity / long-chain-fatty-acid-CoA ligase activity / nucleotide binding	lipid metabolism / metaboloc processes / very-long-chain f.a. Metabolic processes
NM_006931	SLC2A3								0		Many other solute carriers previously identified	3.48536	3.32813e-06		glucose transmembrane transporter	carobohydrate metabolic process; glucose transport
NM_133496	SLC30A7					1			1			1.03155	9.83128e-05
NM_017515	SLC35F2			1				1	2			2.19622	8.34469e-08
NM_018018	SLC38A4								0		Many other solute carriers previously identified	3.64905	1.58067e-05		amino acid transmembrane transporter activity	-
NM_006979	SLC39A7						1	1	2			1.36644	4.01945e-05		protein binding	-
NM_173854	SLC41A1								0		Many other solute carriers previously identified	2.28576	9.47818e-07		-	-
NM_003627	SLC43A1							1	1			1.62089	1.96841e-05		-	-
NM_080546	SLC44A1					1			1			-2.31168	2.63367e-05
NM_033102	SLC45A3						1		1			2.40985	2.10926e-07		-	-
NM_014331	SLC7A11								0		Many other solute carriers previously identified	-1.05833	0.00017948		a.a transmembrane transporter / cystine:glutamate antiporter	a.a transport
NM_003046	SLC7A2								0		Many other solute carriers previously identified	-1.25062	8.32597e-05		basic a.a transmembrane transporter activity	a.a metabolic process / a.a transport / transport
NM_032591	SLC9A7								0		Many other solute carriers previously identified	-1.11588	0.000310129		K:H antiporter / K ion binding / Na ion binding / Na:H antiporter / solute:H antiporter	cation transport / K ion transport / regulation of pH / Na ion transport
NM_030958	SLCO5A1								0		Many other solute carriers previously identified	-1.6495	7.41901e-06		transporter activity	transport
NM_144975	SLFN5								0			-1.50866	1.05439e-05		ATP binding / nucleotide binding	cell differentiation
NM_014926	SLITRK3							1	1			-2.47501	0.000349298		protein binding	axongenesis
NM_032229	SLITRK6								0		SLITRK3	2.30043	0.00014437		#N/A	#N/A
NM_001003	SMAD1							1	1			-1.55274	0.000127078		RNA pol II txn factor activity / protein binding / txn activator activity	MAPKKK cascade / -ve regulation of cell proliferation / +ve regulation of osteoblast diff / +ve regulation of txn from RNApol2 promoter
NM_003078	SMARCD3		1	1				1	3			-1.00671	0.000171853
NM_024624	SMC6								0			-1.21755	0.000100467		ATP binding / nucleotide binding	DNA recombination / DNA repair / response to DNA dmg stimuli
NM_003080	SMPD2							1	1			1.60623	5.75311e-06		sphingomyelin phosphodiesterase activity	sphingomyelin metabolic process
NM_003068	SNAI2					1			1	Validated		4.41	1.39274e-06	No expression without androgens.
NM_003083	SNAPC2								0			1.10817	4.71138e-05		transcription factor activity	snRNA transcription; transcription from RNA polymerase II promoter; transcription from RNA polymerase III promoter
NR_002922	SNORA13								0			-1.04993	0.00020115		-	-
NM_031953	SNX25					1		1	2			1.95637	2.75496e-05
NM_003877	SOCS2						1	1	2	Validated		1.80504	7.98394e-05	5	Growth hormone receptor binding; insulin-like growth factor receptor binding; JAK pathway signal transduction adaptor activity; prolactin receptor binding; SH3/SH2 adaptor activity	anti-apoptosis; cellular response to hormone stimulus; JAK-STAT cascade; regulation of cell growth; response to estradiol stimulus
NM_021069	SORBS2								0			-1.36007	7.42562e-06		cytoskeletal adaptor activity / protein binding / structural constituent of cytoskeleton / structural constituent of muscle	-
NM_003104	SORD	1		1			1	1	4			1.80179	8.65349e-07
NM_003105	SORL1		1						1			-1.90579	5.52928e-07
NM_003112	SP4								0	Validated		-1.0026	1.38897e-05	-1.35	polymerase II transcription factor activity; transcription coactivator activity	regulation of transcription from RNA polymeras II promoter
NM_021928	SPCS3					1		1	2			1.25091	0.000165446
NM_012391	SPDEF	1			1			1	3			2.26808	7.08566e-07
NM_006542	SPHAR		1					1	2			1.39399	8.84746e-05
NM_004598	SPOCK1								0			1.52765	1.23663e-05		-	cell adhesion; cell motion; cell proliferation; multicellular organismal development; nervious system development
NM_005841	SPRY1								0			-2.3671	1.53684e-06
NM_018327	SPTLC3								0			-2.11118	2.07641e-05		acyltransferase activity / pyridoxal phosphate binding / serine C-palmitoyltransferase activity / transferase activity / transfering nitrogenous groups	biosynthetic process
NM_003129	SQLE			1				1	2			1.20943	4.52295e-05
NM_014850	SRGAP3						1		1			-1.27886	7.88014e-06		GTPase activator activity	signal transduction
NM_021203	SRPRB					1			1			1.0392	0.000169958
NM_012446	SSBP2					1		1	2			-1.25074	0.000541913
NM_007107	SSR3					1			1			1.2016	4.618e-05
NM_006278	ST3GAL4								0			1.25592	7.39982e-06		beta-galactoside alpha-2,3-sialyltransferase activity	-
NM_005418	ST5							1	1			-1.0996	0.000254679		protein binding	-
NM_018414	ST6GALNAC1							1	1			2.8026	1.29776e-05		-	protein amino acid glycosylation
NM_018412	ST7	1						1	2			-1.72885	1.57461e-07
NM_024636	STEAP4							1	1			6.8274	1.63078e-07		-	fat cell differentiation
NM_004226	STK17B							1	1			2.50889	1.14939e-05		ATP binding; protein serine/theronine kinase activity	induction of apoptosis; protein amino acid phosphorylation; protein kinase cascade
NM_013233	STK39						1	1	2			1.93047	1.5546e-05		ATP binding; receptor signaling protein serine/threonine kinase activity	protein amino acid phosphorylation; response to stress
NM_182914	SYNE2								0			-1.08299	1.48255e-05		actin binding	-
NM_206927	SYTL2						1	1	2			-2.85494	3.1925e-05		Rab GTPase binding / neurexin binding / phosphoantetheine binding	intracellular protein transport / vesicle-mediated transport
NM_005646	TARBP1		1					1	2			-1.77706	0.000267582
NM_015173	TBC1D1					1			1			1.4219	4.95085e-06
NM_014832	TBC1D4								0		TBC1D1, TBC1D8	1.74402	5.71857e-06		-	-
NM_007063	TBC1D8							1	1			1.63623	2.53888e-05		-	-
NM_032811	TBRG1					1		1	2			2.02766	4.81585e-08
NM_018319	TDP1								0			-1.76495	4.25193e-06		exonuclease activity / hydrolyase activity / phosphoric diester hydrolyase activity / tyrosyl-DNA phosphodiesterase activity	DNA repair / cell death / response to DNA dmg stimuli
NM_003245	TGM3							1	1			-1.46598	3.34818e-05		GDP/GTP binding / GTPase activity / acyltransferase activity / Ca ion binding / Mg ion binding / protein glutamine gamma-glutamyl transferase acitvity / transferase activity, transfering acyl grps	cell envelope organisation / hair follicle morphogenesis / keratinisation / keratinocyte diff / peptide cross-linking / protein mod process / protein tetramerisation
NM_003255	TIMP2						1	1	2			-1.66759	7.94278e-06		enxyme activator activity / enzyme inhibitor activity / integrin binding / metalloendopeptidase inhibitor activity / protein binding	-ve regulation of cell proliferation / regulation of MAPKKK cascade / regulation of cAMP metabolic pathway / regulation of neuron diff
NM_015508	TIPARP							1	1			2.27072	8.26247e-07		protein binding	-
NM_012464	TLL1								0			-2.47672	3.37456e-07		Ca ion binding / metalloendopeptidase activity / peptidase activity / Zn ion binding	cell diff / multicellular organismal development / proteolysis / skeletal system development
NM_015059	TLN2								0			-1.01383	0.000177034		actin binding; protein binding	cell adhesion; cell-cell junction assembly
NM_003265	TLR3								0			-2.17097	3.33181e-05		dsRNA binding / protein binding / transmembrane activity	tumor necrosis factor production / positive regulation of chemokine biosynthetic process / more...see PubMed
NM_020698	TMCC3								0			2.74863	1.6843e-06		-	-
NM_016040	TMED5						1		1			1.02872	0.000193956		-	-
AK097511	TMEM117								0		Many other TMEM proteins identified	-1.46131	0.000292604		-	-
CM000263	TMEM118							1	1			-1.40819	8.10836e-05		protein binding / Zn ion binding	-
NM_018295	TMEM140							1	1			-3.31746	3.69162e-07		-	-
BC054487	TMEM144							1	1			-2.77514	4.72594e-07		-	integral to membrane
NM_018266	TMEM39A							1	1			1.18841	0.000145052		-	-
NM_138788	TMEM45B								0		Many other TMEM proteins identified	-1.31374	1.01712e-05		-	-
AK056816	TMEM79							1	1			1.90401	0.000157949		-	-
AK074243	TMEM87B								0		Many other TMEM proteins identified	1.15907	5.81109e-05		-	-
NM_020182	TMEPAI	1				1		1	3			2.88815	8.59832e-09
NM_005656	TMPRSS2	1				1		1	3			2.56841	1.73432e-06
NM_006290	TNFAIP3							1	1			1.59361	1.27491e-07		protein binding	anti-apoptosis; negative regulation of I-kappaB kinase/NF-kappaB cascade
NM_003842	TNFRSF10B						1	1	2			1.79698	1.31157e-06
NM_005118	TNFSF15								0			-2.01573	3.85374e-06		cytokine activity / tumor necrosis factor recptor binding	capase activation / activation of NF-kappaB-inducing kinase activity / cytokine metabolic process / negative regulation of endothelial cell proliferation
NM_015028	TNIK								0			-1.47391	3.49086e-06		ATP binding / nucleotide binding / protein binding / protein serine/threonine kinase activity / small GTPase regulator activity / transferase activity	JNK cascade / protein a.a phosphorylation / protein kinase cascade / response to stress
NM_000546	TP53								0	No change		-1.5466	4.65316e-05		p53	DNA dmg response / -/+ve regulation of apoptosis/cell cycle/cell growth/txn from RNApol2
NM_033285	TP53INP1								0			-2.07805	4.52822e-07		-	apoptosis
NM_017901	TPCN1								0			-1.16581	0.000129886		Ca channel / Ca ion binding / voltage gated ion channel	Ca ion transport / ion transport
NM_001025	TPD52	1						1	2			2.85117	4.29698e-07
NM_000366	TPM1							1	1			1.14824	3.18283e-05		-	-
NM_025195	TRIB1							1	1			-1.81032	7.71956e-06		ATP binding / mitogen-activated protein kinase kinase binding / protein kinase activity / protein kinase inhibitor activity / txn factor binding	JNK cascade / -ve regulation of txn factor assembly / regulation of MAPK activity
NM_005082	TRIM25								0		TRIM35, TRIM52	-1.09046	0.000273147		metal ion binding / protein binding / txn factor / Zn ion binding	-
NM_018700	TRIM36						1	1	2			1.63808	0.000343537		-	acrosome reaction
NM_032765	TRIM52						1		1			1.07741	0.000563588		-	-
NM_024080	TRPM8								0		TRPS1	1.25368	0.000180724		calcium ion activity; ion channel activity; protein homodimerization activity	calcium ion transport; cellular calcium ion homeostasis; protein homotrimerization; response to temperature stimulus; thermoceptin
NM_014112	TRPS1					1		1	2			-1.27756	9.41024e-06
NM_183422	TSC22D1	1				1		1	3			1.49906	3.36249e-07
NM_015516	TSKU								0			1.50345	2.73247e-05		-	-
NM_004615	TSPAN7								0			-1.37139	5.78081e-05		-	protein a.a N-linked glycosylation
NM_022117	TSPYL2								0			1.08339	6.20501e-05		protein binding; DNA binding	negative regulation of cell cycle; negative regulation of cell growth; negative regulation of DNA regulation; regulation of proteing kinase activity; regulation of signal transduction
NM_020245	TULP4								0			-1.57807	5.54629e-06		protein binding / txn factor activity	intracellular signaling cascade / regulation of txn, DNA dependent / response to nutrient / ubiquitin-dependent protein catabolic process
NM_003115	UAP1	1				1	1		3			2.394	6.01616e-05
NM_003342	UBE2G1			1		1			2			1.29093	1.91056e-05
NM_016021	UBE2J1					1		1	2			1.81325	1.04154e-05
U06641 //	UGT2B15							1	1			-2.49742	0.000144727		glucuronosyltransferase activity / transferase activity, transfering hexosyl groups	metabolic process / steroid metabolic process / xenobiotic metabolic process
NM_001077	UGT2B17							1	1			-2.1177	0.000102347		glucuronosyltransferase activity	metabolic process / steroid metabolic process
NM_053039	UGT2B28								0		UGT2B15, UGTB17	1.79184	0.000121716		-	metabolic process; xenobolic metabolic process
NM_013396	USP25								0		USP33	-1.0119	0.000180197		peptidase activity; ubiquitin-specific protease activity	protein modifiction process; proteolysis
NM_015017	USP33						1		1			1.30808	2.87992e-05		protein binding; ubiquitin specific protease activity	protein deubiquitination; ubiquitin-dependent protein catabolic process;
NM_019050	USP53								0		USP33	-1.14922	0.000111881		-	-
NM_014000	VCL					1	1		2	Validated		1.27468	0.000138259	1.36
NM_001025366	VEGFA								0	Validated		1.39389	0.000259762	1.51	#N/A	#N/A
NM_003383	VLDLR						1	1	2			2.40327	9.36702e-06		low-density lipoprotein receptor activity	memory; nervous system development; signal transduction
NM_016485	VTA1								0			-1.14095	0.000158152		protein binding	-
NM_014149	WDR91								0			-1.07146	6.25083e-06		-	-
NM_017983	WIPI1							1	1			3.16001	1.63434e-06		estrogen receptor binding; androgen receptor binding; phosphoinositol 3-phosphate binding	autophagy; vesicle targetting;
NM_015238	WWC1							1	1			2.13806	6.53253e-06		-	-
NM_018982	YIPF1								0			1.41397	9.92302e-05		-	-
NM_014950	ZBTB1								0		ZBTB16, ZBTB43	1.26466	1.67791e-05		-	-
NM_006006	ZBTB16		1	1					2			1.08048	3.72198e-05
NM_014007	ZBTB43					1			1			-1.61277	3.65017e-05
NM_198581	ZC3H6								0			-1.1859	0.000386461		-	-
NM_024617	ZCCHC6								0			1.39717	9.03765e-05		-	-
NM_024721	ZFHX4					1			1			-1.09767	1.65082e-05
NM_007129	ZIC2					1			1			-1.8078	1.10886e-06
NM_021632	ZNF350								0	No change		1.17367	0.000125068		DNA binding; protein binding; transcription repressor activity	negative regulation of transcription; regulation of transcription, DNA-dependent
NM_014897	ZNF652								0	No change		1.15851	4.03732e-05		protein binding	-
